# Supplementary material
Source: PubMed Central journal article supplement (PMC2423813)
Supplement: NIHMS50520-supplement-2.pdf [file NIHMS50520-supplement-2.pdf]

Supplemental Table 1. Primers used for RT real-time PCR of the Na,K-ATPase  $\beta_1$  subunit and glycosyltransferases.

| Enzymes                       | Accession # | Primers                                                                 |
|-------------------------------|-------------|-------------------------------------------------------------------------|
| Na,K-ATPase $\beta_1$ subunit | NM001003283 | Sense: TCAGCGAATTCAAGCCCACATACC<br>Antisense: CGCCCAGGCCAAAATACTCCA     |
| GT*                           | XM538701    | Sense: GCCTCAGCTTCTCCATCCTCATAA<br>Antisense: ATAGCATTCTGGGCGAGATACAGAC |
| ST                            | XM843848    | Sense: GCCGCTGCGTGGTGGTG<br>Antisense: ATCTTGCGTGGCTGTTTCATTGG          |
| GnT-III                       | XM538365    | Sense: GTCATCAACGCCATCAACATCAA<br>Antisense: GGTCAGGAAGGTGCGCAGGTAGTC   |
| GnT-IVA                       | XM531790    | Sense: TGGAAGAACGGGAGTGTCAATAG<br>Antisense: GGTTTTGCTTTGTTCTCCATCTTA   |
| GnT-IVB                       | XM538579    | Sense: GACTTCATCCGCTTCCGCTTCTT<br>Antisense: GGTCCACCTCGCCCTCTGC        |
| GnT-IVC                       | XM532641    | Sense: AAATGAGATGCCTGCGAAAAC<br>Antisense: TAAAAGACCCCGGAAATGAGTT       |
| GnT-V                         | XM541015    | Sense: GCAGCGCATTGGCAAGTTAGAGTC<br>Antisense: GGCCACCACTGAAAGCTGTCTCTG  |

\*Abbreviations: GT - UDP-Gal:betaGlcNAc beta-1,4-galactosyltransferase 1, membrane-bound form; ST – beta-galactoside-alpha-2,3-sialyltransferase 4, GnT –N-acetylglucosamine-glycosyltransferase

Supplemental Figure 1

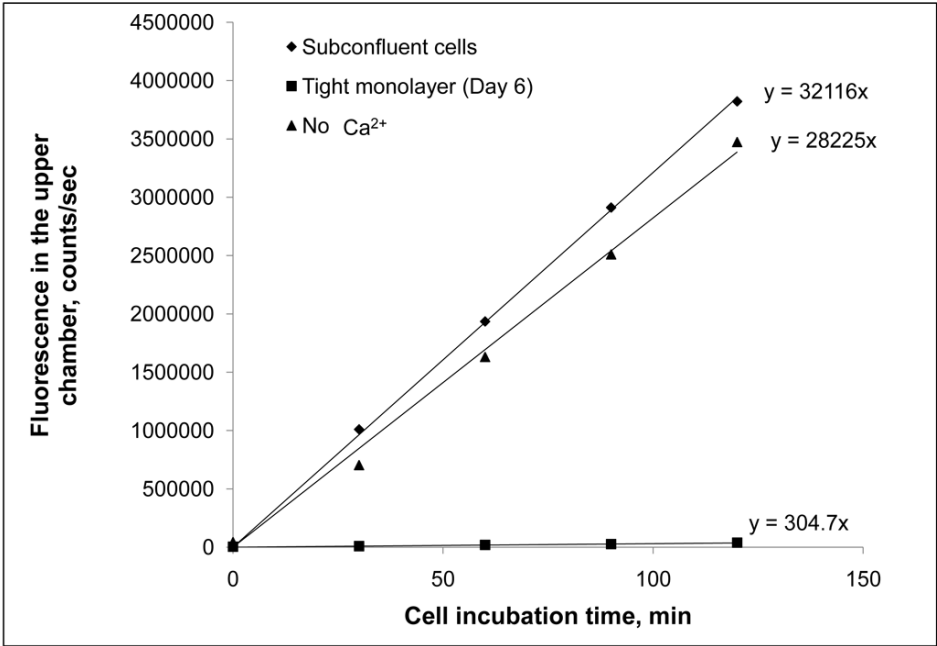

Supplemental Figure 2

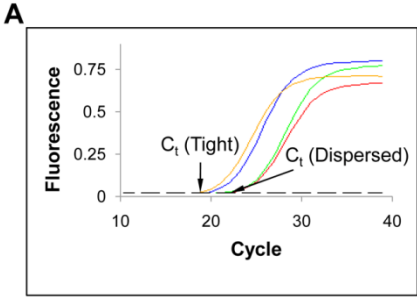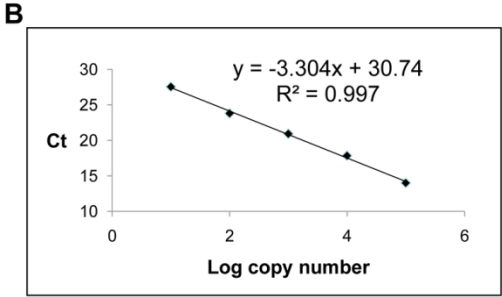

**Supplemental Figure 3**

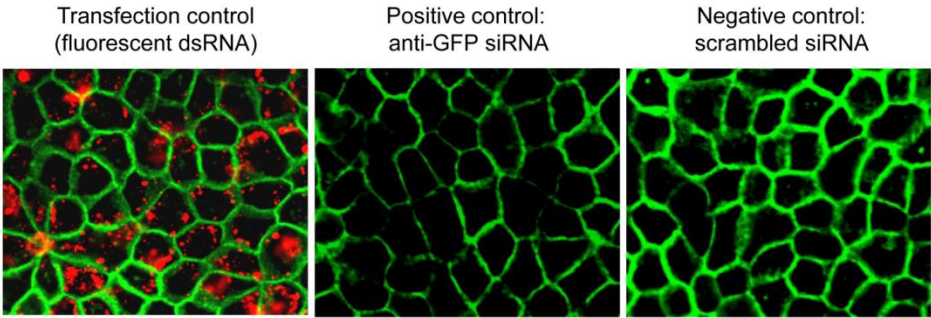

Green – YFP-β<sub>1</sub>, red – fluorescent double-stranded RNA

Supplemental Figure 4

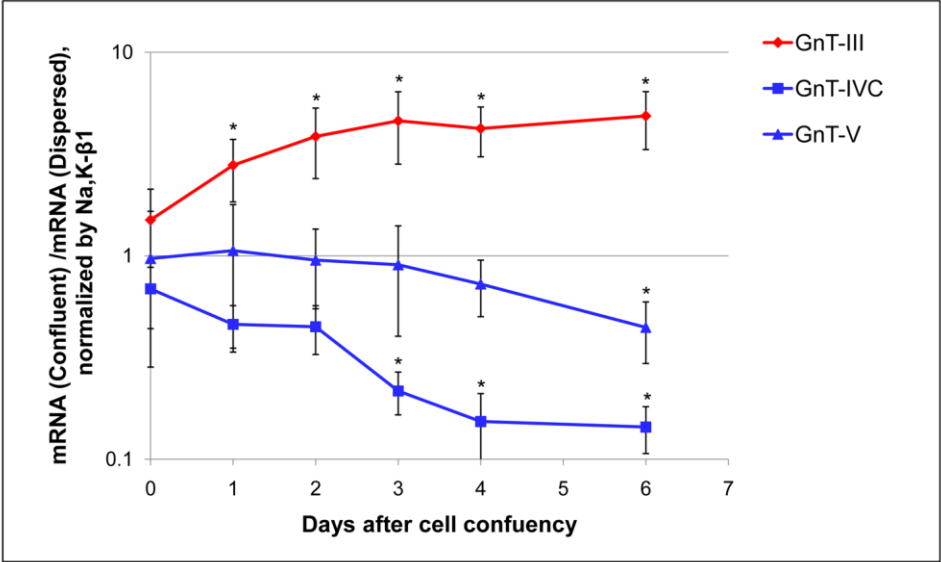

**Supplemental Fig. 1.** The paracellular flux of the membrane impermeable dye, BCECF free acid, decreases about 100-fold as a result of formation of the confluent MDCK cell monolayer and its maturation for 6 days. Conversely, disruption of intercellular junctions by pre-incubation of the tight cell monolayers in  $\text{Ca}^{2+}$ -free PBS buffer for 30 min followed by cell incubation with BCECF free acid in PBS for 2 hours increases the paracellular dye flux to the level observed in sub-confluent MDCK cells.

**Supplemental Fig. 2.** Representative graphs show results of the real-time PCR and a standard curve used for quantification of mRNA. Accumulation of the PCR product for GnT-III using the same amounts of total RNA isolated from the dispersed MDCK cells and the tight MDCK cell monolayers as templates is shown (A). The PCR product obtained using primers for GnT-III was purified as described in Experimental Procedures and used as a template for the real-time PCR. The range of PCR product concentrations was chosen so that the standard curve included the values of  $C_t$  observed for the RNA samples from the tight monolayers and dispersed cells (19.2 and 21.1 for GnT-III). The resulting values of  $C_t$  were plotted against the logarithms of the PCR copy number to generate a standard curve (B) that was used to determine the efficiency and sensitivity of amplification. Similarly, a standard curve for mRNA quantification was obtained for each primer set. The values of slopes for the standard curves varied in the range between 3.25 and 3.41.

**Supplemental Fig. 3.** The efficiency of transfection with siRNA was close to 100% as detected by using a fluorescently labeled transfection control (IDT). MDCK cells stably expressing YFP- $\beta_1$  were transfected with transfection control (fluorescently labeled double-stranded RNA), positive control (anti-GFP siRNA) and negative control (scrambled double-stranded RNA) (IDT). Confocal microscopy images were taken 72 hrs after transfection. Almost each cell was transfected (*left panel*). About 50% of YFP- $\beta_1$  silencing was achieved by transfection of anti-GFP siRNA as seen from comparing the *middle* and *right* panels.

**Supplemental Fig. 4.** Expression of the genes encoding GnT-III, GnT-IVC and GnT-V gradually changes during development of the tight cell monolayer from dispersed MDCK cells as determined by RT real-time PCR. Abbreviations are as in the legend to Fig. 4. Error bars,  $\pm$ s.d. (n=3). \*Significant difference with dispersed cells.  $P < 0.01$ , Student's *t*-test.
